# Supplementary material for: Differential miRNA Expression Contributes to Emergence of Multiple Cancer Stem Cell Subpopulations in Human Colorectal Cancer
Source: PubMed Central journal article supplement — bioRxiv. 2023 Feb 6:2023.02.06.527341. Preprint. [Version 1] doi: 10.1101/2023.02.06.527341 (PMC9934564; doi:10.1101/2023.02.06.527341), 2023-02-06
Supplement: media-1.pdf [file media-1.pdf]

## **SUPPLEMENTAL INFORMATION**

| <b>Table S1. Significantly expressed miRNAs in different CSC subpopulations*.</b> |               |
|-----------------------------------------------------------------------------------|---------------|
| <u>LGR5/ALDH FACS Isolation</u>                                                   | <u>miRNAs</u> |
| LGR5+/ALDH- cells                                                                 | 310           |
| LGR5-/ALDH+ cells                                                                 | 15            |
|                                                                                   |               |
| <u>CD166/ALDH FACS Isolation</u>                                                  | <u>miRNAs</u> |
| CD166+/ALDH- cells                                                                | 1             |
| CD166-/ALDH+ cells                                                                | 2             |
|                                                                                   |               |
| <u>CD166/LRG5 FACS Isolation</u>                                                  | <u>miRNAs</u> |
| CD166+/LRG5- cells                                                                | 1             |
| CD166-/LRG5+ cells                                                                | 102           |
|                                                                                   |               |
| <u>LRIG1/LGR5 FACS Isolation</u>                                                  | <u>miRNAs</u> |
| LRIG1+/LGR5- cells                                                                | 4             |
| LRIG1-/LGR5+ cells                                                                | 673           |
|                                                                                   |               |
| <u>LRIG1/ALDH FACS Isolation</u>                                                  | <u>miRNAs</u> |
| LRIG1+/ALDH- cells                                                                | 101           |
| LRIG1-/ALDH+ cells                                                                | 4             |
|                                                                                   |               |
| <u>CD166/LRIG1 FACS Isolation</u>                                                 | <u>miRNAs</u> |
| CD166+/LRIG1- cells                                                               | 29            |
| CD166-/LRIG1+ cells                                                               | 4             |
| *Based on $p$ -value < 0.05.                                                      |               |

| <b>Table S2. The mRNAs predicted to be targeted by the miRNAs in each CSC subpopulation were found to have different functional classifications</b> |                                                               |     |                                                           |                           |
|-----------------------------------------------------------------------------------------------------------------------------------------------------|---------------------------------------------------------------|-----|-----------------------------------------------------------|---------------------------|
| LGR5 vs. ALDH                                                                                                                                       | zinc finger motifs                                            | vs. | phosphoproteins, and protein binding                      | Figure 2 vs. Figure 3     |
| CD166 vs. ALDH                                                                                                                                      | alternative splicing, phosphoproteins, and membrane           | vs. | phosphoprotein, nucleus, cytoplasm, and nucleus functions | Figure S2 vs. Figure S3   |
| LRIG1 vs. CD166                                                                                                                                     | alternative splicing, transcriptional regulation, and nucleus | vs. | phosphoprotein functions                                  | Figure S5 vs. Figure S6   |
| LRIG1 vs. ALDH                                                                                                                                      | alternative splicing and as protein kinase domains            | vs. | phosphoproteins, protein binding                          | Figure S8 vs. Figure S9   |
| LGR5 vs. LRIG1                                                                                                                                      | cytoplasm and different protein domains                       | vs. | alternative splicing, protein binding, and phosphoprotein | Figure S11 vs. Figure S12 |
| LGR5 vs. CD166                                                                                                                                      | splice variant, phosphoprotein and zinc finger motifs         | vs. | phosphoprotein, protein binding, cytoplasm, and nucleus   | Figure S14 vs. Figure S15 |

### Tables S3 & S4. BIOINFORMATICS ANALYSIS OF LGR5 and ALDH DATA

To determine what might distinguish the different CSC subpopulations from each other, a detailed analysis of the LGR5 and ALDH data was done. Then a bioinformatics analysis was done to determine which genes in the Retinoic Acid (Table 1) and WNT (Table 2) signaling pathways were predicted to be targeted by these miRNAs.

| <b>Table S3. Retinoic Acid Pathway Genes Analyzed</b> |                                          |
|-------------------------------------------------------|------------------------------------------|
| <i>ADH1A</i>                                          | Alcohol Dehydrogenase 1A                 |
| <i>ADH1B</i>                                          | Alcohol Dehydrogenase 1B                 |
| <i>ADH1C</i>                                          | Alcohol Dehydrogenase 1C                 |
| <i>ADH4</i>                                           | Alcohol Dehydrogenase 4                  |
| <i>ADH5</i>                                           | Alcohol Dehydrogenase 5                  |
| <i>ADH6</i>                                           | Alcohol Dehydrogenase 6                  |
| <i>ADH7</i>                                           | Alcohol Dehydrogenase 7                  |
| <i>ALDH16A1</i>                                       | Aldehyde Dehydrogenase 16A1              |
| <i>ALDH18A1</i>                                       | Aldehyde Dehydrogenase 18A1              |
| <i>ALDH1A1</i>                                        | Aldehyde Dehydrogenase 1A1               |
| <i>ALDH1A2</i>                                        | Aldehyde Dehydrogenase 1A2               |
| <i>ALDH1A3</i>                                        | Aldehyde Dehydrogenase 1A3               |
| <i>ALDH1B1</i>                                        | Aldehyde Dehydrogenase 1B1               |
| <i>ALDH1L1</i>                                        | Aldehyde Dehydrogenase 1L1               |
| <i>ALDH1L2</i>                                        | Aldehyde Dehydrogenase 1L2               |
| <i>ALDH2</i>                                          | Alcohol Dehydrogenase 2                  |
| <i>ALDH3A1</i>                                        | Aldehyde Dehydrogenase 3A1               |
| <i>ALDH3A2</i>                                        | Aldehyde Dehydrogenase 3A2               |
| <i>ALDH3B1</i>                                        | Aldehyde Dehydrogenase 3B1               |
| <i>ALDH3B2</i>                                        | Aldehyde Dehydrogenase 3B2               |
| <i>ALDH4A1</i>                                        | Aldehyde Dehydrogenase 4A1               |
| <i>ALDH5A1</i>                                        | Aldehyde Dehydrogenase 5A1               |
| <i>ALDH6A1</i>                                        | Aldehyde Dehydrogenase 6A1               |
| <i>ALDH7A1</i>                                        | Aldehyde Dehydrogenase 7A1               |
| <i>ALDH8A1</i>                                        | Aldehyde Dehydrogenase 8A1               |
| <i>ALDH9A1</i>                                        | Aldehyde Dehydrogenase 9A1               |
| <i>CRABP1</i>                                         | Cellular Retinoic Acid Binding Protein 1 |
| <i>CRABP2</i>                                         | Cellular Retinoic Acid Binding Protein 2 |
| <i>CRBP</i>                                           | Cellular Retinol Binding Protein         |
| <i>CYP26A1</i>                                        | Cytochrome P450 26A1                     |
| <i>CYP26B1</i>                                        | Cytochrome P450 26B1                     |
| <i>CYP26C1</i>                                        | Cytochrome P450 26C1                     |
| <i>RARA</i>                                           | Retinoic Acid Receptor Alpha             |
| <i>RARB</i>                                           | Retinoic Acid Receptor Beta              |

|              |                               |
|--------------|-------------------------------|
| <i>RARG</i>  | Retinoic Acid Receptor Gamma  |
| <i>RBP1</i>  | Retinol Binding Protein 1     |
| <i>RBP2</i>  | Retinol Binding Protein 2     |
| <i>RBP3</i>  | Retinol Binding Protein 3     |
| <i>RBP4</i>  | Retinol Binding Protein 4     |
| <i>RBP5</i>  | Retinol Binding Protein 5     |
| <i>RBP7</i>  | Retinol Binding Protein 7     |
| <i>RDH10</i> | Retinol Dehydrogenase 10      |
| <i>RDH11</i> | Retinol Dehydrogenase 11      |
| <i>RDH12</i> | Retinol Dehydrogenase 12      |
| <i>RDH13</i> | Retinol Dehydrogenase 13      |
| <i>RDH14</i> | Retinol Dehydrogenase 14      |
| <i>RDH16</i> | Retinol Dehydrogenase 16      |
| <i>RDH5</i>  | Retinol Dehydrogenase 5       |
| <i>RDH8</i>  | Retinol Dehydrogenase 8       |
| <i>RXRA</i>  | Retinoid X Receptor Alpha     |
| <i>RXRB</i>  | Retinoid X Receptor Beta      |
| <i>RXRG</i>  | STRA6                         |
| <i>STRA6</i> | Stimulated by retinoic acid 6 |
| <i>TTR</i>   | Transthyretin                 |

| <b><u>Table S4. WNT Pathway Genes Analyzed</u></b> |                                                               |
|----------------------------------------------------|---------------------------------------------------------------|
| <i>APC</i>                                         | adenomatous polyposis coli                                    |
| <i>AXIN1</i>                                       | aka Axin 1 a protein coding gene                              |
| <i>AXIN2</i>                                       | aka Axin 2 a protein coding gene                              |
| <i>BTRC</i>                                        | Beta-transducin repeat containing E3 ubiquitin protein ligase |
| <i>CSNK1A1/CK1</i>                                 | casein kinase 1 alpha 1                                       |
| <i>CK1 beta</i>                                    | casein kinase 1 beta 1                                        |
| <i>CK1 gamma 1</i>                                 | casein kinase 1 gamma 1                                       |
| <i>CK1 gamma 2</i>                                 | casein kinase 1 gamma 2                                       |
| <i>CK1 gamma 3</i>                                 | casein kinase 1 gamma 3                                       |
| <i>CK1 delta</i>                                   | casein kinase 1 delta                                         |
| <i>CK1 epsilon</i>                                 | casein kinase 1 epsilon                                       |
| <i>CTNNB1</i>                                      | Beta-catenin 1                                                |
| <i>DVL1</i>                                        | dishevelled (DSH) DVL in mammals 1                            |
| <i>DVL2</i>                                        | dishevelled (DSH) DVL in mammals 2                            |
| <i>DVL3</i>                                        | dishevelled (DSH) DVL in mammals 3                            |
| <i>FZD1</i>                                        | Frizzled Class Receptor 1                                     |
| <i>FZD2</i>                                        | Frizzled Class Receptor 2                                     |
| <i>FZD3</i>                                        | Frizzled Class Receptor 3                                     |

|              |                                                             |
|--------------|-------------------------------------------------------------|
| <i>FZD4</i>  | Frizzled Class Receptor 4                                   |
| <i>FZD5</i>  | Frizzled Class Receptor 5                                   |
| <i>FZD6</i>  | Frizzled Class Receptor 6                                   |
| <i>FZD7</i>  | Frizzled Class Receptor 7                                   |
| <i>FZD8</i>  | Frizzled Class Receptor 8                                   |
| <i>FZD9</i>  | Frizzled Class Receptor 9                                   |
| <i>FZD10</i> | Frizzled Class Receptor 10                                  |
| <i>GSK3B</i> | Glycogen Synthase Kinase 3 Beta                             |
| <i>LGR4</i>  | Leucine Rich Repeat Containing G Protein-Coupled Receptor 4 |
| <i>LGR5</i>  | Leucine Rich Repeat Containing G Protein-Coupled Receptor 5 |
| <i>LGR6</i>  | Leucine Rich Repeat Containing G Protein-Coupled Receptor 6 |
| <i>LRP5</i>  | Low-density lipoprotein receptor-related protein 5          |
| <i>LRP6</i>  | Low-density lipoprotein receptor-related protein 6          |
| <i>RNF43</i> | Ring finger protein 43                                      |
| <i>ZNRF3</i> | Zinc and Ring Finger 3                                      |

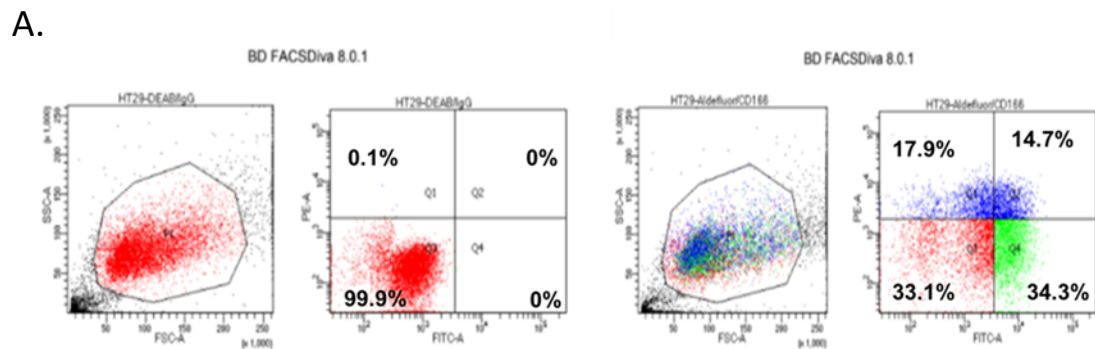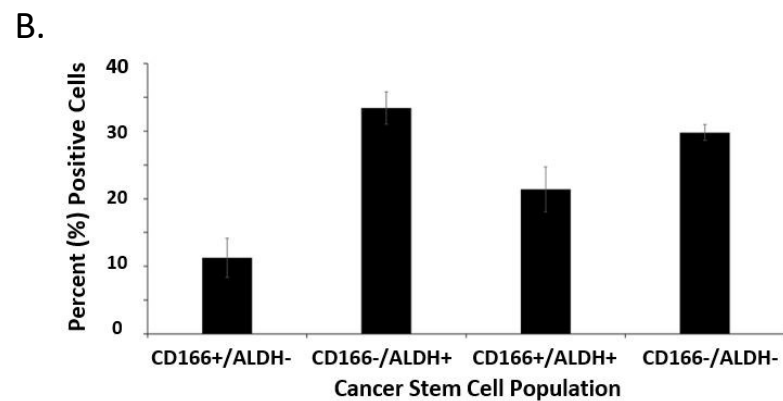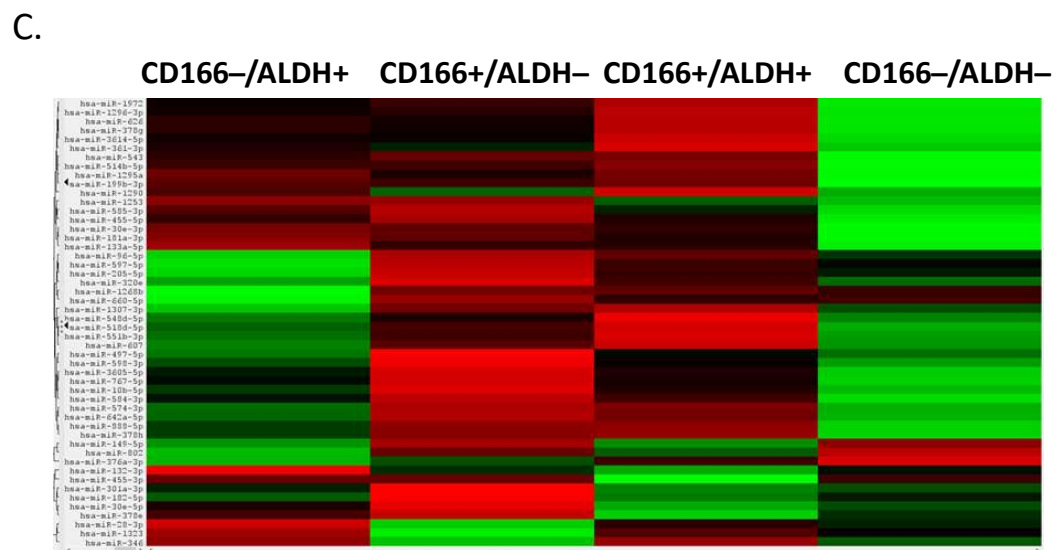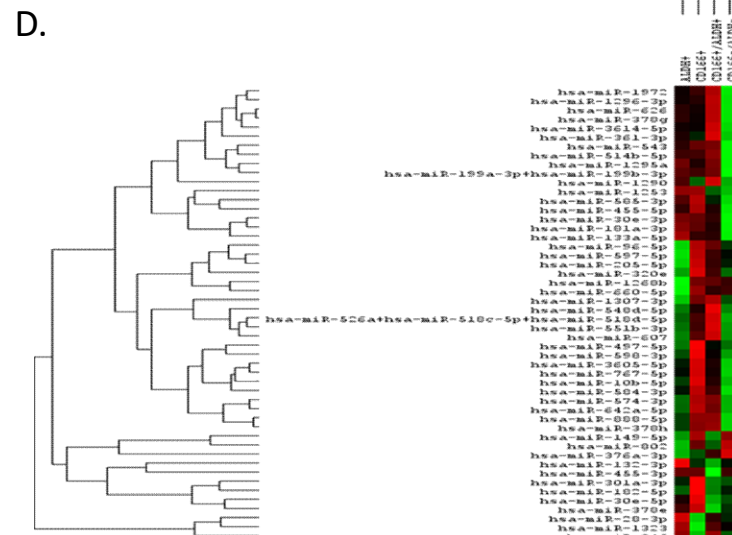

Figure S1

**E. CD166+/ALDH- Top miRNAs**

| Name            | p-Value  | Ratio |
|-----------------|----------|-------|
| hsa-miR-185-5p  | 0.005335 | 1.52  |
| hsa-miR-34a-5p  | 0.079482 | 1.84  |
| hsa-miR-28-5p   | 0.097872 | 1.80  |
| hsa-miR-135b-5p | 0.13191  | 1.42  |
| hsa-miR-183-5p  | 0.148579 | 1.23  |
| hsa-miR-1246    | 0.185359 | 1.91  |
| hsa-miR-1323    | 0.341565 | 2.08  |
| hsa-miR-26a-5p  | 0.377387 | 1.21  |
| hsa-miR-196a-5p | 0.413641 | 1.31  |
| hsa-miR-1299    | 0.42265  | 1.22  |

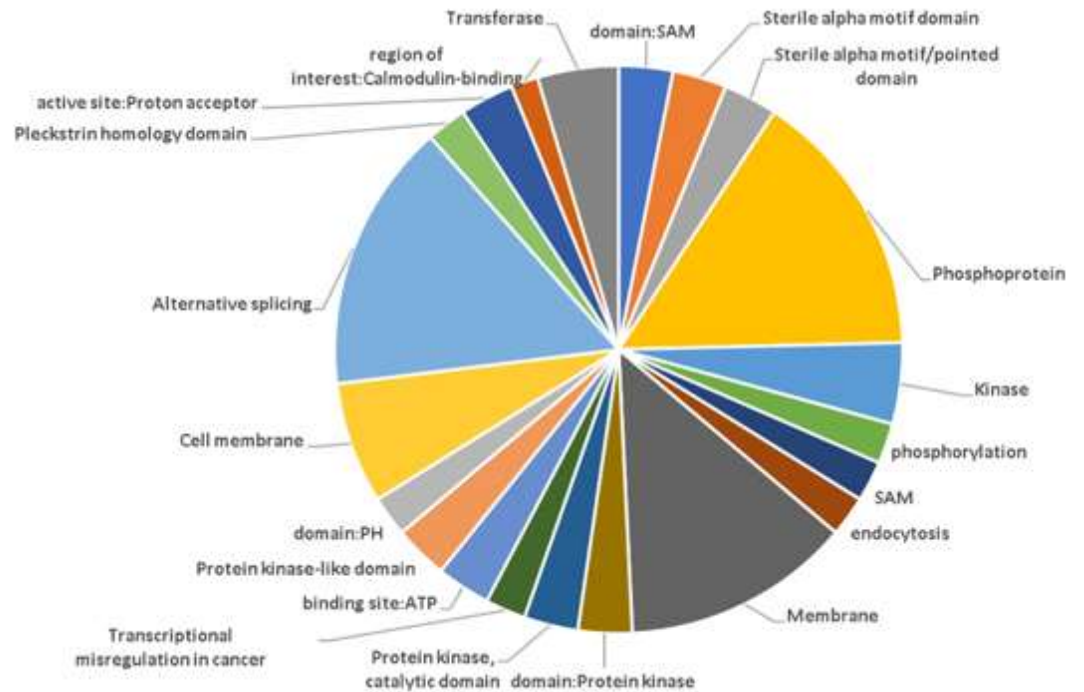

**F. ALDH+/CD166- Top miRNAs**

| Name            | p-Value  | Ratio |
|-----------------|----------|-------|
| hsa-miR-301a-3p | 0.024285 | 1.59  |
| hsa-miR-96-5p   | 0.041435 | 1.61  |
| hsa-miR-29b-3p  | 0.071412 | 1.18  |
| hsa-miR-429     | 0.084041 | 1.54  |
| hsa-miR-182-5p  | 0.085607 | 1.54  |
| hsa-miR-660-5p  | 0.100104 | 1.92  |
| hsa-miR-200a-3p | 0.100196 | 1.47  |
| hsa-miR-10a-5p  | 0.104863 | 1.16  |
| hsa-miR-93-5p   | 0.106804 | 1.25  |
| hsa-miR-194-5p  | 0.107797 | 1.32  |

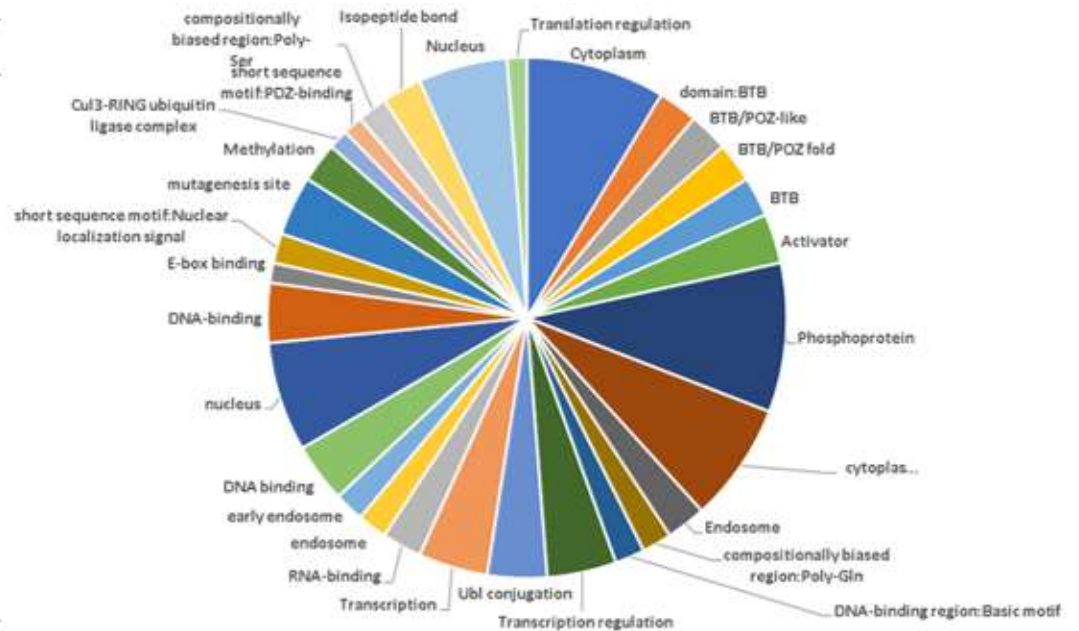

Figure S1

A.

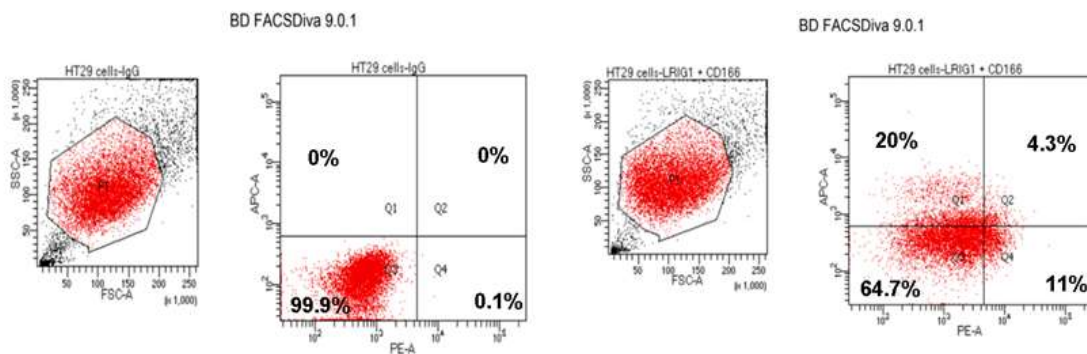

B.

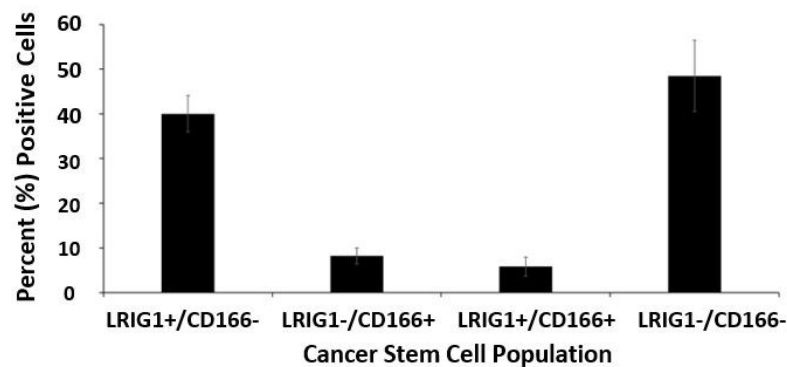

C. LRIG1-/CD166+ LRIG1+/CD166+ LRIG1+/CD166- LRIG1-/CD166-

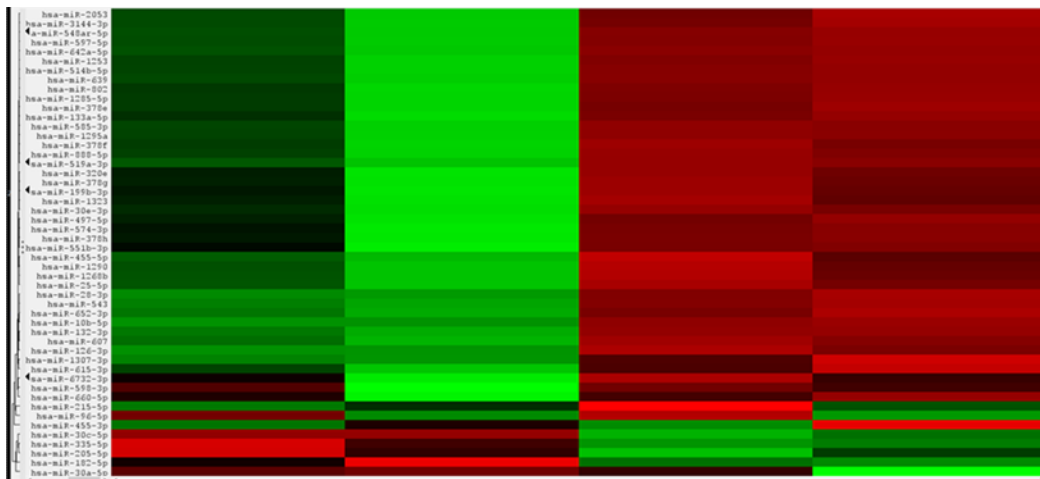

D.

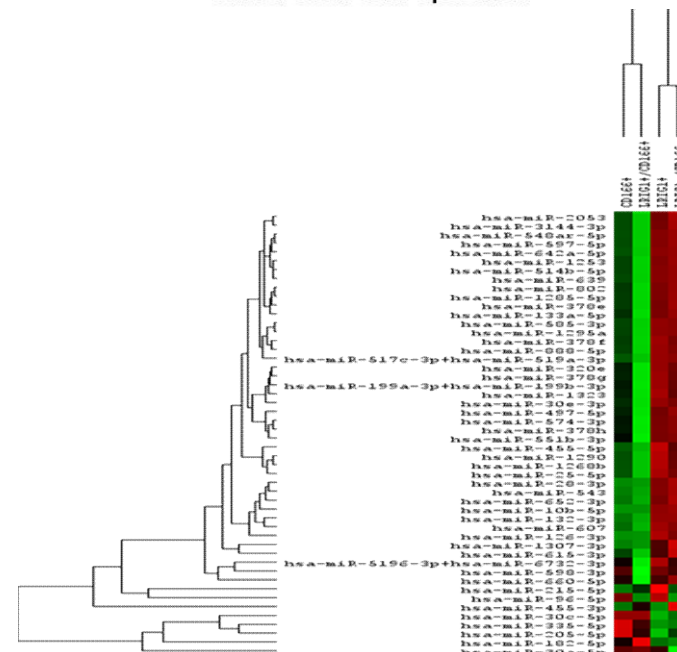

Figure S2



**E. LRIG1+/CD166- Top miRNAs**

| Name            | p-Value  | Ratio |
|-----------------|----------|-------|
| hsa-miR-374b-5p | 0.009738 | 1.39  |
| hsa-miR-205-5p  | 0.010734 | 4.21  |
| hsa-let-7i-5p   | 0.044163 | 1.58  |
| hsa-miR-192-5p  | 0.04518  | 1.62  |
| hsa-miR-429     | 0.0745   | 1.64  |
| hsa-miR-106b-5p | 0.116775 | 1.43  |
| hsa-miR-590-5p  | 0.126675 | 1.56  |
| hsa-miR-361-5p  | 0.128048 | 1.18  |
| hsa-miR-27b-3p  | 0.131583 | 1.4   |
| hsa-miR-374a-5p | 0.198531 | 1.58  |

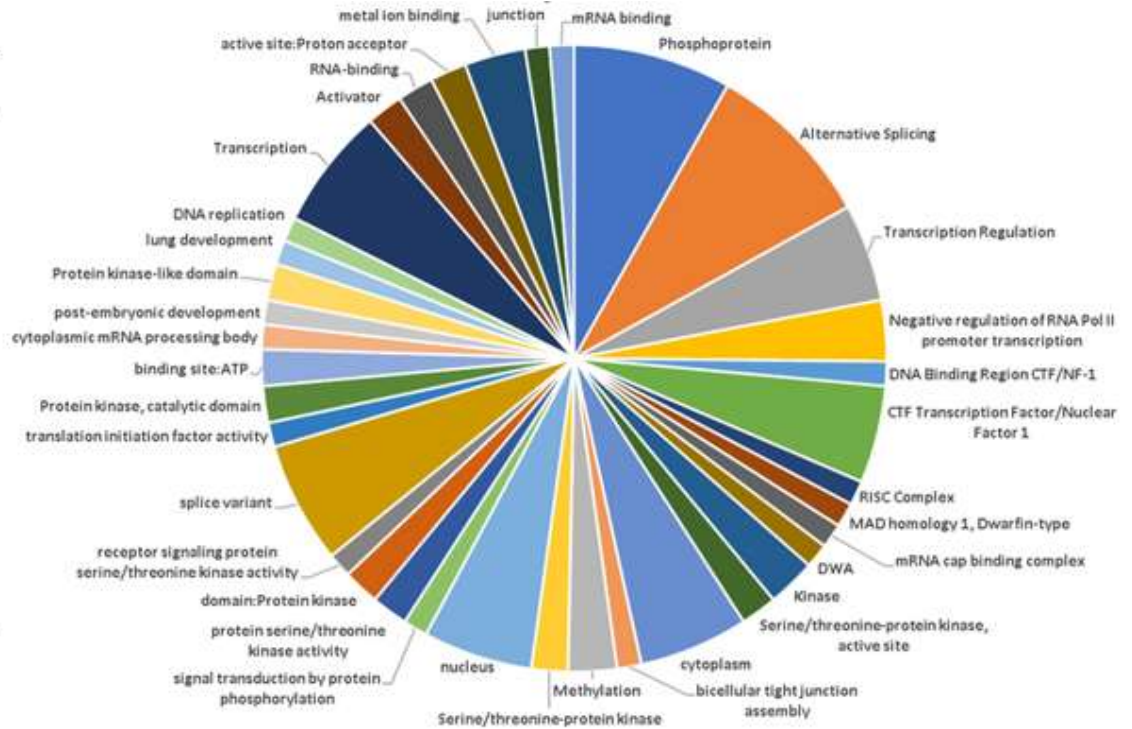

**F. CD166+/LRIG1- Top miRNAs**

| Name             | p-Value  | Ratio |
|------------------|----------|-------|
| hsa-miR-608      | 0.004408 | 1.61  |
| hsa-miR-1200     | 0.006728 | 1.72  |
| hsa-miR-582-3p   | 0.011376 | 2.00  |
| hsa-miR-548y     | 0.012319 | 2.13  |
| hsa-miR-30a-3p   | 0.014378 | 2.08  |
| hsa-miR-28-3p    | 0.02381  | 1.64  |
| hsa-miR-517c-3p* | 0.024478 | 2.13  |
| hsa-miR-1302     | 0.025088 | 2.08  |
| hsa-miR-28-5p    | 0.02628  | 2.04  |
| hsa-miR-628-3p   | 0.027493 | 1.75  |

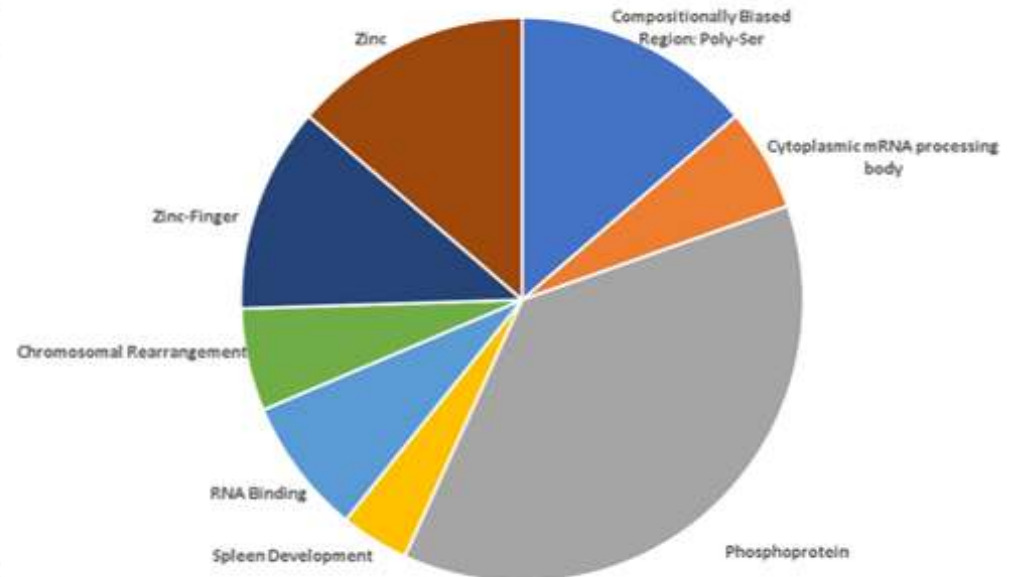

\*hsa-miR-517c-3p+hsa-miR-519a-3p

Figure S2

A.

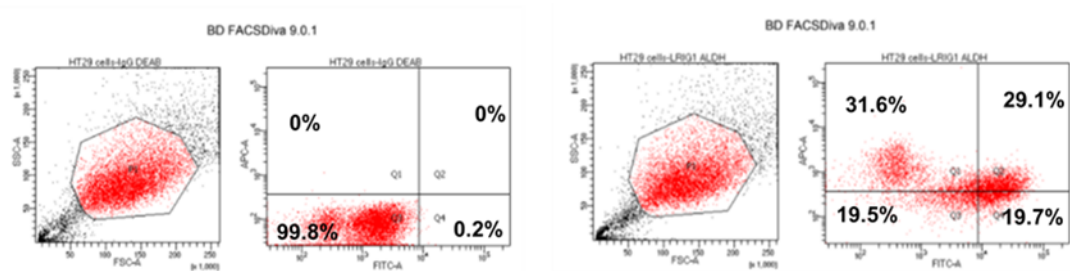

B.

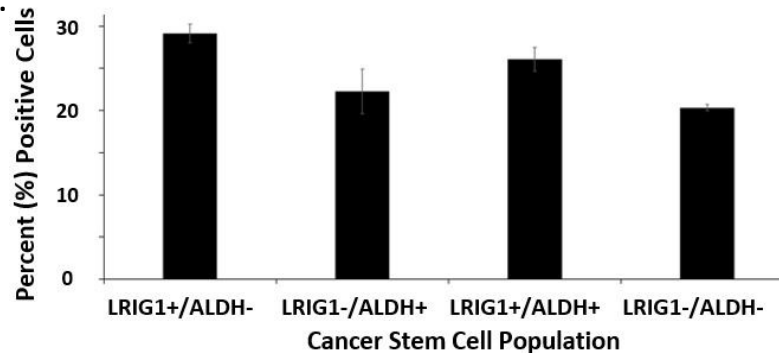

C. LRIG1-/ALDH+ LRIG1+/ALDH+ LRIG1-/ALDH- LRIG1+/ALDH-

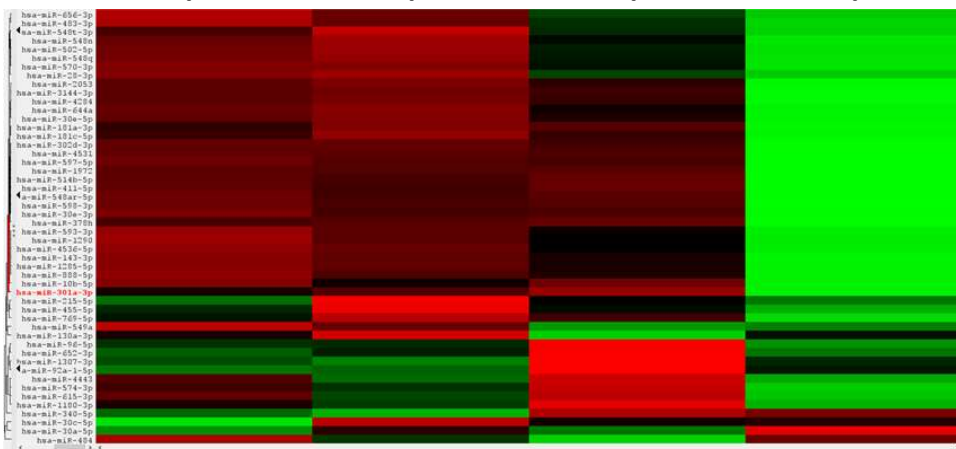

D.

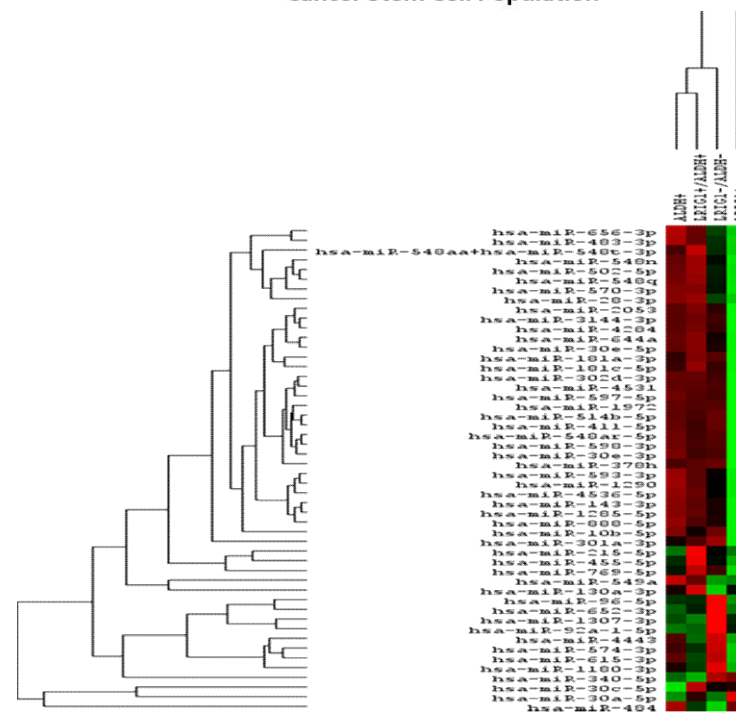

Figure S3

### E. LRIG1+/ALDH- Top miRNAs

| Name            | p-Value  | Ratio |
|-----------------|----------|-------|
| hsa-miR-5001-5p | 0.0029   | 2.41  |
| hsa-miR-193b-3p | 0.007301 | 2.03  |
| hsa-miR-1290    | 0.007807 | 3.22  |
| hsa-miR-208a-3p | 0.008697 | 3.06  |
| hsa-miR-510-3p  | 0.00965  | 2.47  |
| hsa-miR-365b-5p | 0.010913 | 2.37  |
| hsa-miR-663a    | 0.01348  | 3.70  |
| hsa-miR-1297    | 0.014174 | 2.19  |
| hsa-miR-205-5p  | 0.014201 | 4.33  |
| hsa-miR-3614-5p | 0.015049 | 3.18  |

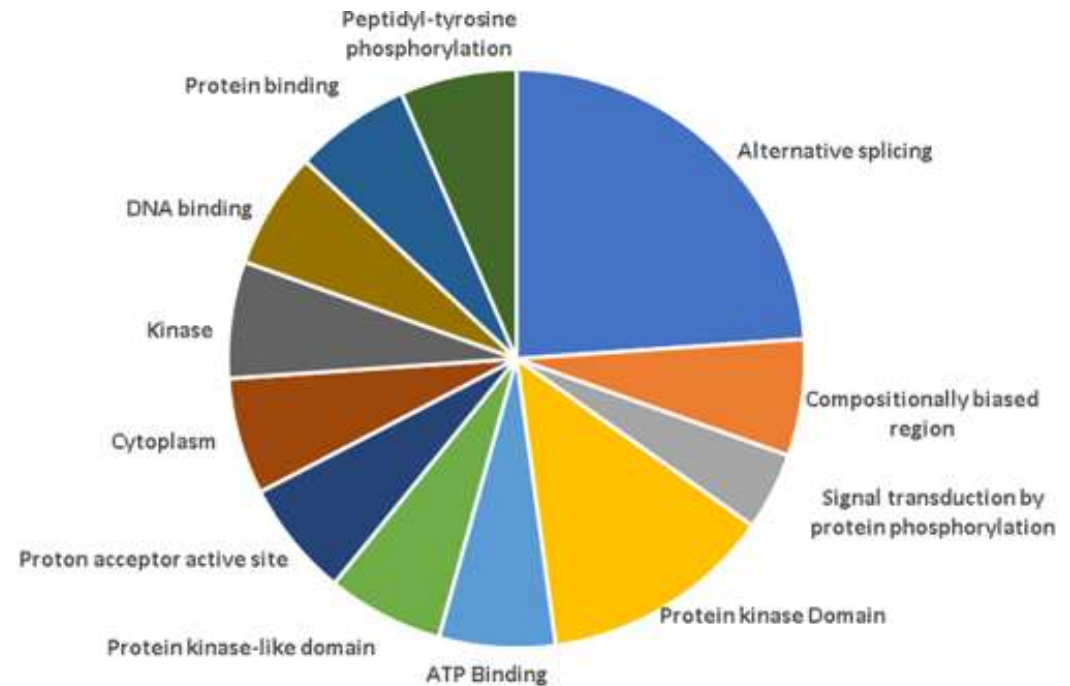

### F. ALDH+/LRIG1- Top miRNAs

| Name            | p-Value  | Ratio |
|-----------------|----------|-------|
| hsa-miR-148a-3p | 0.007872 | 1.64  |
| hsa-miR-3928-3p | 0.009459 | 1.12  |
| hsa-miR-194-5p  | 0.012492 | 1.89  |
| hsa-miR-375     | 0.021317 | 1.61  |
| hsa-miR-22-3p   | 0.056906 | 1.69  |
| hsa-miR-192-5p  | 0.062684 | 1.56  |
| hsa-miR-185-5p  | 0.064618 | 1.32  |
| hsa-miR-19a-3p  | 0.068956 | 1.96  |
| hsa-miR-140-5p  | 0.071816 | 1.75  |
| hsa-miR-27b-3p  | 0.078661 | 1.37  |

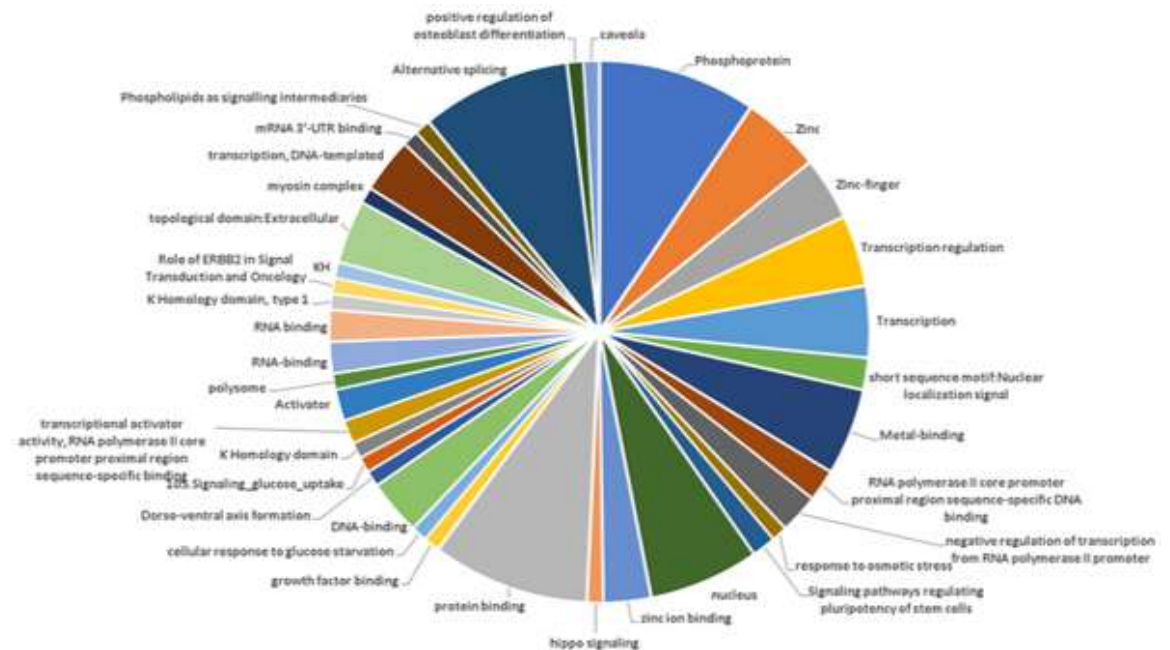

Figure S3

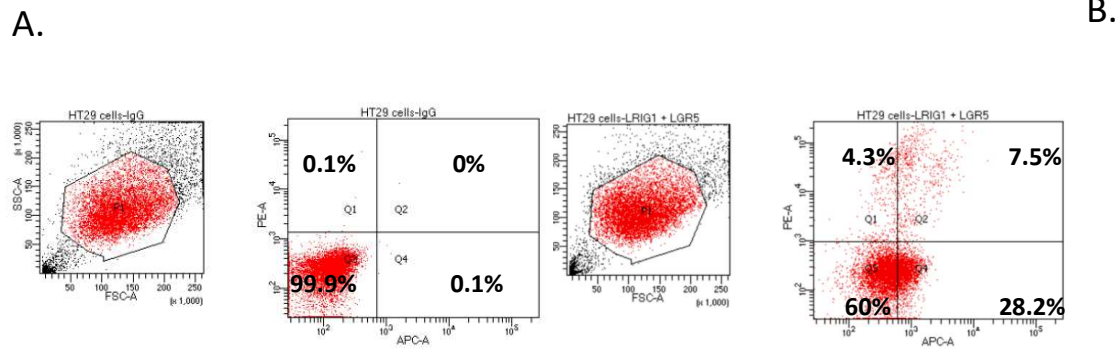

**B.**

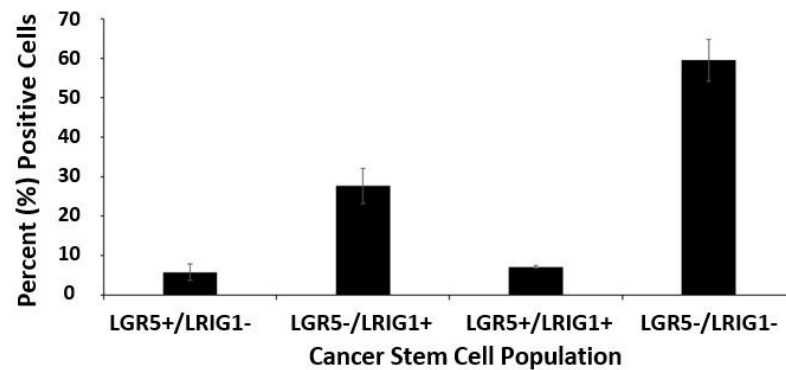

**C.**

LGR5+/LRIG1- LGR5+/LRIG1+ LGR5-/LRIG1- LGR5-/LRIG1+

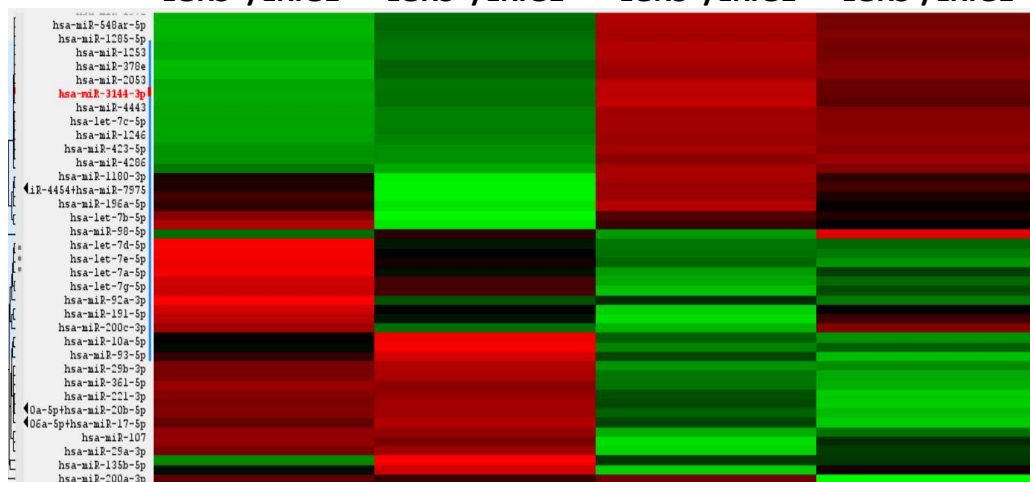

**D.**

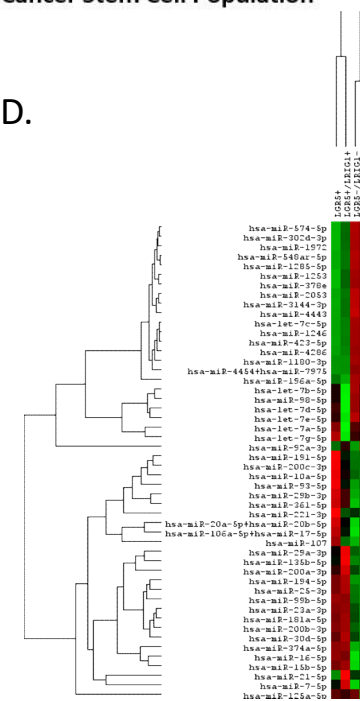

Figure S4

**E.**

**LGR5+/LRIG1- Top miRNAs**

| Name              | p-Value  | Ratio    |
|-------------------|----------|----------|
| hsa-miR-455-3p    | 0.000516 | 5.626198 |
| hsa-miR-424-5p    | 0.001786 | 7.473064 |
| hsa-miR-454-3p    | 0.00185  | 3.375876 |
| hsa-miR-544a      | 0.001903 | 9.050518 |
| hsa-miR-935       | 0.001946 | 9.763292 |
| hsa-miR-874-5p    | 0.002336 | 11.21283 |
| hsa-miR-219a-2-3p | 0.002448 | 13.2283  |
| hsa-miR-218-5p    | 0.002587 | 9.866657 |
| hsa-miR-532-5p    | 0.002709 | 6.301194 |
| hsa-miR-1972      | 0.002842 | 24.14922 |

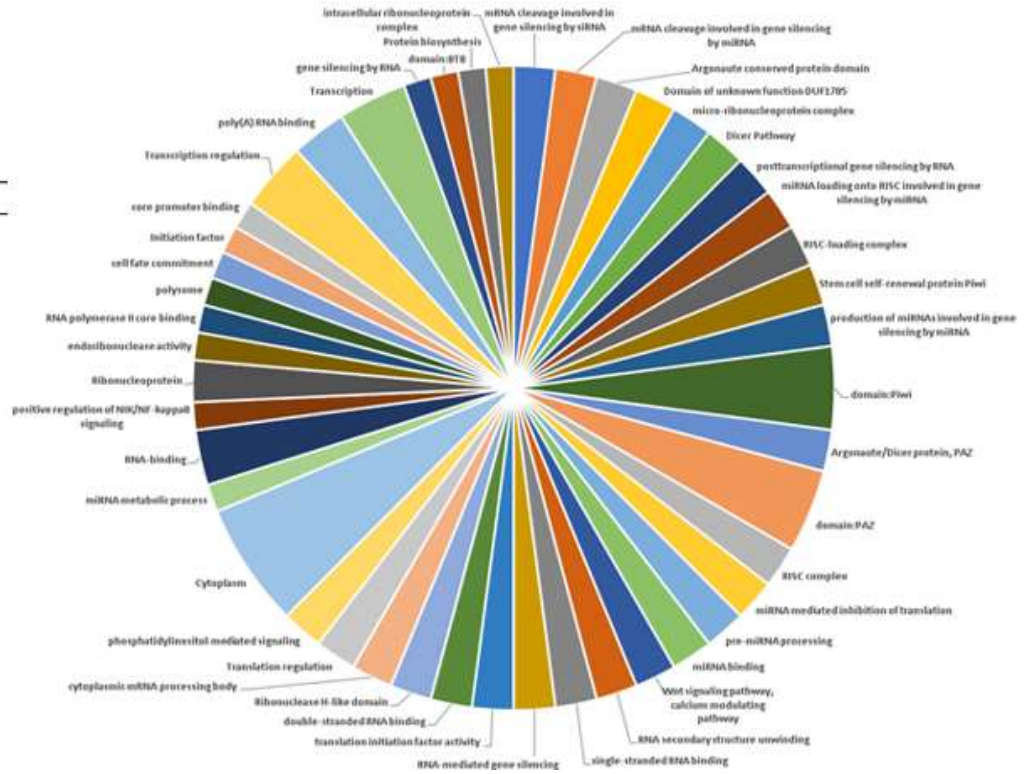

**F.**

**LRIG1+/LGR5- Top miRNAs**

| Name            | p-Value  | Ratio    |
|-----------------|----------|----------|
| hsa-miR-200b-3p | 0.006559 | 2.129456 |
| hsa-miR-194-5p  | 0.010642 | 2.207357 |
| hsa-miR-23a-3p  | 0.032224 | 1.784871 |
| hsa-miR-29a-3p  | 0.034529 | 1.311528 |
| hsa-miR-10a-5p  | 0.06363  | 2.184755 |
| hsa-miR-30d-5p  | 0.071142 | 1.691372 |
| hsa-miR-15b-5p  | 0.092976 | 1.587857 |
| hsa-miR-374a-5p | 0.107158 | 2.051671 |
| hsa-miR-191-5p  | 0.120353 | 1.675972 |
| hsa-miR-361-5p  | 0.128485 | 1.191644 |

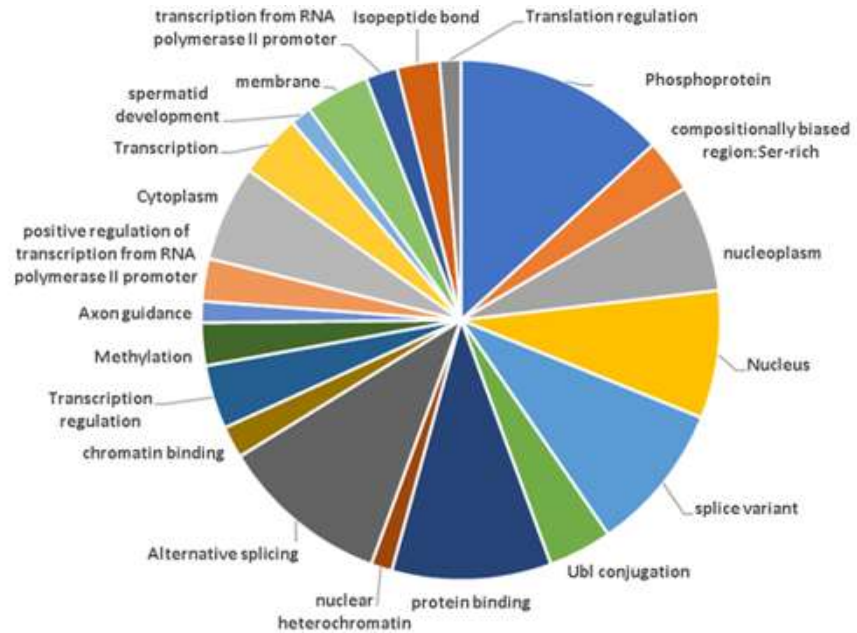

Figure S4

A.

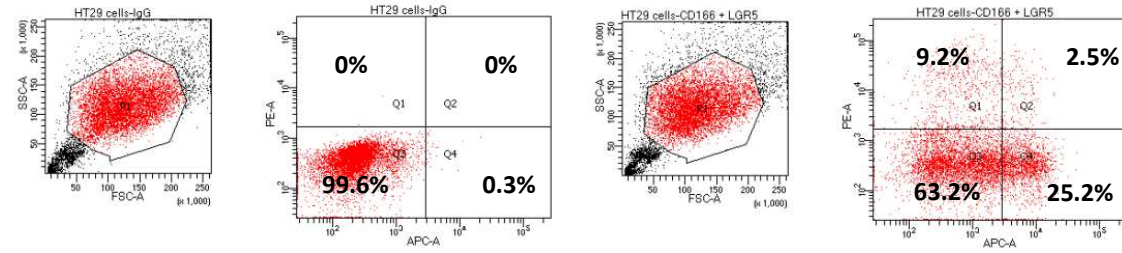

B.

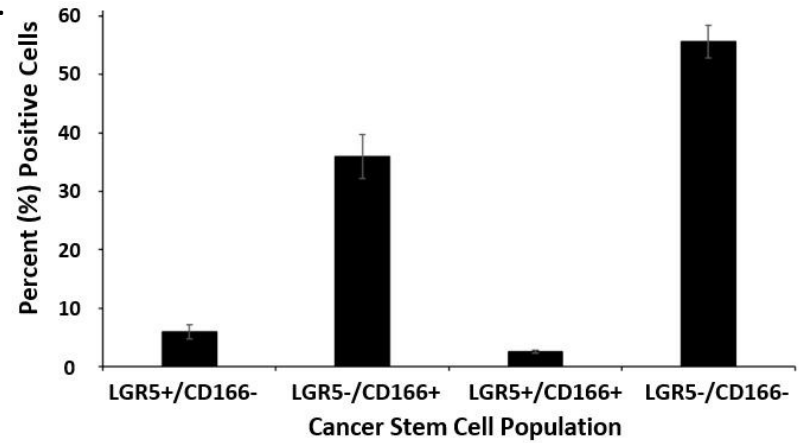

C.

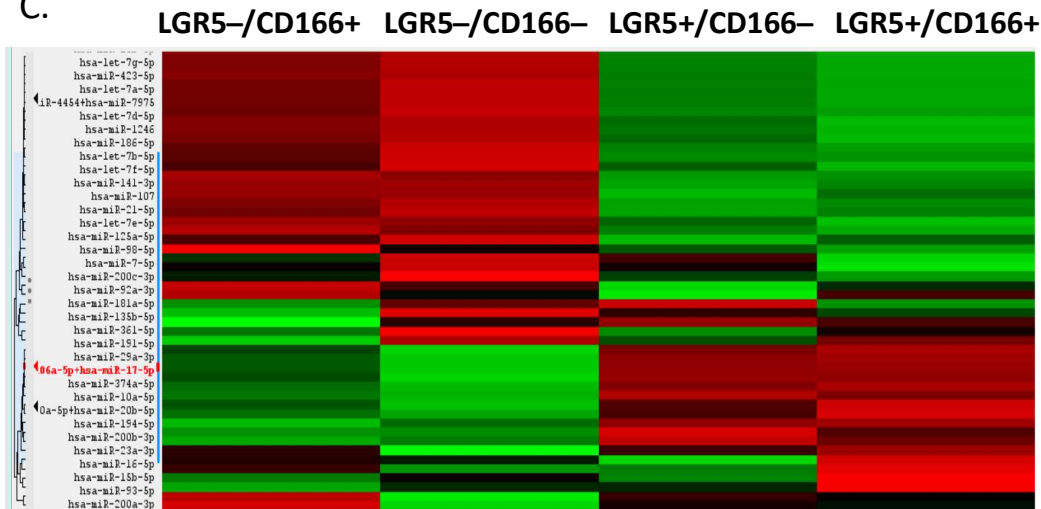

D.

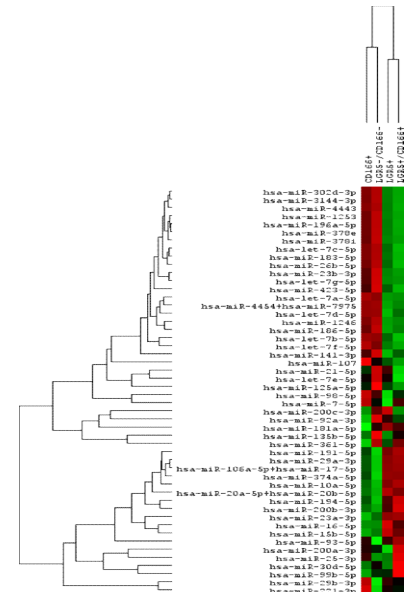

Figure S5

### E. LGR5+/CD166- Top miRNAs

| Name              | p-Value  | Ratio  |
|-------------------|----------|--------|
| hsa-miR-4454*     | 0.002637 | 8.333  |
| hsa-miR-664b-5p   | 0.005766 | 6.667  |
| hsa-miR-196a-5p   | 0.005853 | 1.370  |
| hsa-miR-3918      | 0.010346 | 5.556  |
| hsa-miR-1204      | 0.013975 | 10.000 |
| hsa-miR-376a-2-5p | 0.014634 | 6.250  |
| hsa-miR-362-3p    | 0.01532  | 9.091  |
| hsa-miR-142-5p    | 0.015663 | 5.556  |
| hsa-miR-1908-5p   | 0.017958 | 10.000 |
| hsa-miR-142-3p    | 0.019367 | 3.226  |

\*hsa-miR-4454+hsa-miR-7975

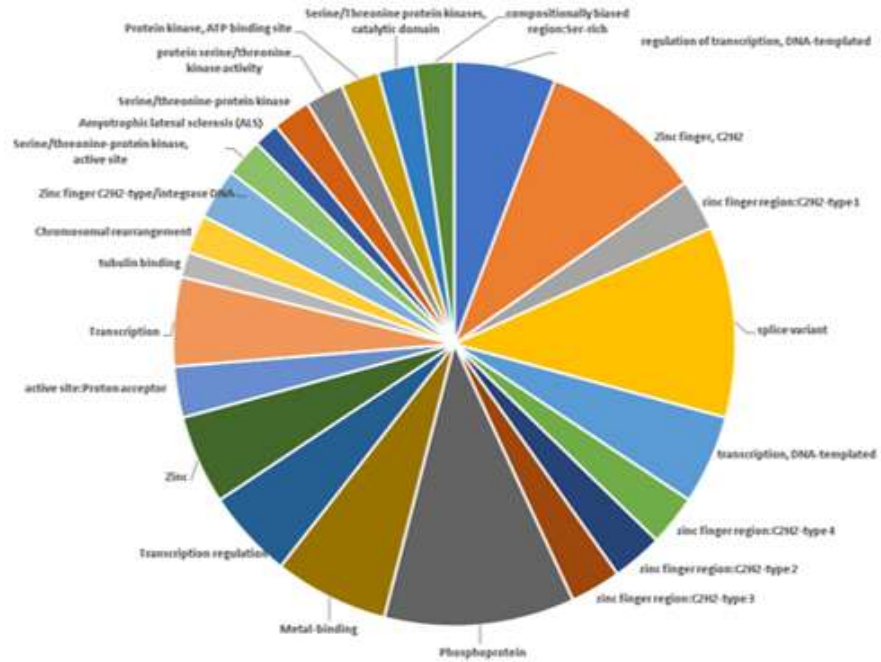

### F. CD166+/LGR5- Top miRNAs

| Name              | p-Value  | Ratio |
|-------------------|----------|-------|
| hsa-miR-15b-5p    | 0.034841 | 2.06  |
| hsa-miR-16-5p     | 0.055473 | 2.04  |
| hsa-miR-29a-3p    | 0.143658 | 1.41  |
| hsa-miR-194-5p    | 0.165687 | 1.44  |
| hsa-miR-20a-5p*   | 0.174565 | 1.48  |
| hsa-miR-1283      | 0.212371 | 3.81  |
| hsa-miR-181a-5p   | 0.213746 | 1.46  |
| hsa-miR-23a-3p    | 0.25129  | 1.37  |
| hsa-miR-106a-5p** | 0.26257  | 1.17  |
| hsa-let-7i-5p     | 0.267539 | 11.00 |

\*hsa-miR-20a-5p+hsa-miR-20b-5p, \*\*hsa-miR-106a-5p+hsa-miR-17-5p

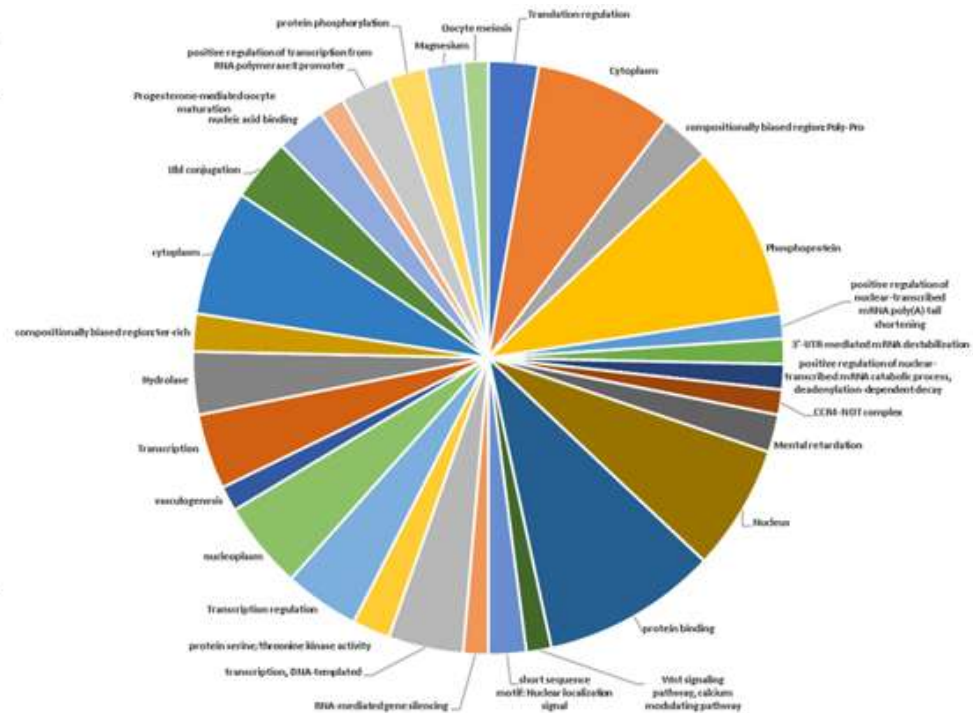

Figure S5
